# Supplementary material for: Response of protonated, adduct, and fragmented ions in Vocus proton-transfer-reaction time-of-flight mass spectrometer (PTR-ToF-MS)
Source: Copernicus journal article supplement (doi:10.5194/amt-17-2415-2024), 2024-04-23
Supplement: Supplementary file 1 [file amt-17-2415-2024-supplement.pdf]

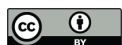

*Supplement of*

**Response of protonated, adduct, and fragmented ions in  
Vocus proton-transfer-reaction time-of-flight mass  
spectrometer (PTR-ToF-MS)**

**Fangbing Li et al.**

*Correspondence to:* Yong Jie Li (yongjieli@um.edu.mo)

The copyright of individual parts of the supplement might differ from the article licence.

## List of the supporting information:

### Tables.

|                                                                                                                                                                       |   |
|-----------------------------------------------------------------------------------------------------------------------------------------------------------------------|---|
| <b>Table S1.</b> The details of instrument setting experiments. ....                                                                                                  | 4 |
| <b>Table S2.</b> Details of the tested volatile organic compounds (VOCs). Also shown are their proton affinity (PA) values. ....                                      | 5 |
| <b>Table S3.</b> Proton-transfer reaction rate constants ( $k_{\text{ptr}}$ , $\times 10^{-9} \text{ cm}^3 \text{ molec}^{-1} \text{ s}^{-1}$ ) from literature. .... | 6 |
| <b>Table S4.</b> The RH dependence, sensitivity, intercept of protonated adducts, and fragmented ions. ....                                                           | 7 |

### Figures.

|                                                                                                                                                                                                                                                                                                                                                                                                                                                                                                                                                                                                                                                                                                                                                                                                                                                                                                                                                  |    |
|--------------------------------------------------------------------------------------------------------------------------------------------------------------------------------------------------------------------------------------------------------------------------------------------------------------------------------------------------------------------------------------------------------------------------------------------------------------------------------------------------------------------------------------------------------------------------------------------------------------------------------------------------------------------------------------------------------------------------------------------------------------------------------------------------------------------------------------------------------------------------------------------------------------------------------------------------|----|
| <b>Figure S1.</b> The diagram of the RH experimental setup. MFC: mass flow controller. ....                                                                                                                                                                                                                                                                                                                                                                                                                                                                                                                                                                                                                                                                                                                                                                                                                                                      | 8  |
| <b>Figure S2.</b> The mass spectra of aromatic hydrocarbons (benzene, toluene, m-xylene, and 1,2,4-trimethylbenzene), and terpenoids (isoprene, $\alpha$ -pinene, and $\beta$ -caryophyllene) in Vocus at a mixing ratio of $\sim 12$ ppbv ( $\beta$ -caryophyllene 1.2 ppbv). ....                                                                                                                                                                                                                                                                                                                                                                                                                                                                                                                                                                                                                                                              | 9  |
| <b>Figure S3.</b> The mass spectra of small aldehydes (formaldehyde and acetaldehyde), long-chain aldehydes (n-butanal, pentanal, and hexaldehyde), and ketones (acetone, and methyl ethyl ketone) in Vocus at a mixing ratio of $\sim 12$ ppbv. ....                                                                                                                                                                                                                                                                                                                                                                                                                                                                                                                                                                                                                                                                                            | 10 |
| <b>Figure S4.</b> The mass spectra of unsaturated aldehydes (acrolein and methacrolein), aromatic aldehydes (benzaldehyde and m-tolualdehyde), nitriles (acetonitrile and acrylonitrile), and methanol in Vocus at a mixing ratio of $\sim 12$ ppbv. ....                                                                                                                                                                                                                                                                                                                                                                                                                                                                                                                                                                                                                                                                                        | 11 |
| <b>Figure S5.</b> Time series of the protonated ion ( $\text{MH}^+$ ) signals for selected (A) VOCs and (B) OVOCs as concentration varied from 0 to $\sim 22$ ppbv ( $\sim 2$ ppbv for $\beta$ caryophyllene) under dry ( $\text{MH} \sim 5\%$ ) conditions. Note the signals were magnified by 10 times for $\beta$ -caryophyllene and 3 times for n-butanal, pentanal, and hexaldehyde. ....                                                                                                                                                                                                                                                                                                                                                                                                                                                                                                                                                   | 12 |
| <b>Figure S6.</b> Time series of the protonated ion ( $\text{MH}^+$ ), adduct ions ( $[\text{MH} + \text{H}_2\text{O}]^+$ ), and fragmented ions ( $[\text{MH} - \text{H}_2\text{O}]^+$ and/or $[\text{MH} - \text{C}_x\text{H}_y]^+$ ) signals for n-butanal, pentanal, and hexaldehyde. Note that the time in x axis is not continuous, with some periods with noisy signals cut off. ....                                                                                                                                                                                                                                                                                                                                                                                                                                                                                                                                                     | 13 |
| <b>Figure S7.</b> The signal intensities (panels a, b, and c, and panels g, h, and i) and fractions (panels d, e, and f, and panels j, k, and l) of protonated ion ( $\text{MH}^+$ ), adduct ions ( $[\text{MH} + \text{H}_2\text{O}]^+$ ), and fragmented ions ( $[\text{MH} - \text{H}_2\text{O}]^+$ and $[\text{MH} - \text{C}_x\text{H}_y]^+$ ) for $\alpha$ -pinene as functions of E/N ratio (a, d, g, and j), RF amplitude (b, e, h, and k), and BSQ amplitude (c, f, i, and l). The difference between a/d and g/j is that the former fixed N ( $p = 2.0$ mbar) and varied axial voltage (V) to change E/N ratio, while the latter fixed V ( $= 466$ volts) and varied p (i.e., N) to change E/N ratio. The difference between b/e and h/k and between c/f and i/l is that the former was at $p = 2.0$ mbar while the latter $p = 3.5$ mbar. If not varied, RF amplitude was set at 500 volts and BSQ amplitude at 300 volts. ....       | 14 |
| <b>Figure S8.</b> The signal intensities (panels a, b, and c, and panels g, h, and i) and fractions (panels d, e, and f, and panels j, k, and l) of protonated ion ( $\text{MH}^+$ ), adduct ions ( $[\text{MH} + \text{H}_2\text{O}]^+$ ), and fragmented ions ( $[\text{MH} - \text{H}_2\text{O}]^+$ and $[\text{MH} - \text{C}_x\text{H}_y]^+$ ) for 1,2,4-trimethylbenzene as functions of E/N ratio (a, d, g, and j), RF amplitude (b, e, h, and k), and BSQ amplitude (c, f, i, and l). The difference between a/d and g/j is that the former fixed N ( $p = 2.0$ mbar) and varied axial voltage (V) to change E/N ratio, while the latter fixed V ( $= 466$ volts) and varied p (i.e., N) to change E/N ratio. The difference between b/e and h/k and between c/f and i/l is that the former was at $p = 2.0$ mbar while the latter $p = 3.5$ mbar. If not varied, RF amplitude was set at 500 volts and BSQ amplitude at 300 volts. .... | 15 |
| <b>Figure S9.</b> The signal intensities (panels a, b, and c, and panels g, h, and i) and fractions (panels d, e, and f, and panels j, k, and l) of protonated ion ( $\text{MH}^+$ ), adduct ions ( $[\text{MH} + \text{H}_2\text{O}]^+$ ), and fragmented ions ( $[\text{MH} - \text{H}_2\text{O}]^+$ and $[\text{MH} - \text{C}_x\text{H}_y]^+$ ) for acetone as functions of E/N ratio (a, d, g, and j), RF amplitude (b, e, h, and k), and BSQ amplitude (c, f, i, and l). The difference between a/d and g/j is that the former fixed N ( $p = 2.0$ mbar) and varied axial voltage (V) to change E/N ratio, while the latter fixed V ( $= 466$ volts) and varied p (i.e., N) to change E/N ratio. The difference between b/e and h/k and between c/f and i/l is that the former was at $p = 2.0$ mbar while the latter $p = 3.5$ mbar. If not varied, RF amplitude                                                                          |    |

|     |                                                                                                              |    |
|-----|--------------------------------------------------------------------------------------------------------------|----|
| 72  | was set at 500 volts and BSQ amplitude at 300 volts. ....                                                    | 16 |
| 73  | Figure S10. The signal intensities (panels a, b, and c, and panels g, h, and i) and fractions                |    |
| 74  | (panels d, e, and f, and panels j, k, and l) of protonated ion ( $MH^+$ ), adduct ions ( $[MH +$             |    |
| 75  | $H_2O]^+$ ), and fragmented ions ( $[MH - H_2O]^+$ and $[MH - C_xH_y]^+$ ) for hexaldehyde as                |    |
| 76  | functions of E/N ratio (a, d, g, and j), RF amplitude (b, e, h, and k), and BSQ amplitude                    |    |
| 77  | (c, f, i, and l). The difference between a/d and g/j is that the former fixed N ( $p = 2.0$ mbar)            |    |
| 78  | and varied axial voltage (V) to change E/N ratio, while the latter fixed V ( $= 466$ volts) and              |    |
| 79  | varied p (i.e., N) to change E/N ratio. The difference between b/e and h/k and between c/f                   |    |
| 80  | and i/l is that the former was at $p = 2.0$ mbar while the latter $p = 3.5$ mbar. If not varied,             |    |
| 81  | RF amplitude was set at 500 volts and BSQ amplitude at 300 volts. ....                                       | 17 |
| 82  | Figure S11. The ratio of $\alpha$ -pinene signals ( $MH^+$ : 137 Th; $[MH - C_xH_y]^+$ : 81 Th) to all ion   |    |
| 83  | signals. This was used to estimate the E/N ratio. ....                                                       | 18 |
| 84  | Figure S12. The sensitivity of acetone. An intercept above zero indicates a high background                  |    |
| 85  | value. ....                                                                                                  | 18 |
| 86  | Figure S13. The signal intensities of $H_3O^+$ , $H_3OH_2O^+$ , and $H_3O(H_2O)_2^+$ as conditions varied as |    |
| 87  | in Figures 3 in the main text and S14 below. ....                                                            | 19 |
| 88  | Figure S14. The ratio of the logarithm of intensity (panels a, b, and c) and the difference of               |    |
| 89  | fractional signal of the protonated ion ( $MH^+$ ) among all ions (panels d, e, and f), when                 |    |
| 90  | changing axial voltage (V) or FIMR pressure (p) (panels a and d), RF amplitude (panels                       |    |
| 91  | b and e), and BSQ amplitude (panels c and f). The ratios were taken after taking the                         |    |
| 92  | logarithm of the signal intensities of $MH^+$ at the right-hand side of the instrument setting               |    |
| 93  | (after the arrow) to that at the left-hand side of the instrument setting stated in the panel                |    |
| 94  | label; likewise, the fractional differences are the fractions of the $MH^+$ signal among the                 |    |
| 95  | protonated, fragmented, and adduct signals under these two instrumental settings. ....                       | 20 |
| 96  | Figure S15. The dependence of the $[MH+H_2O]^+$ signals on RH for the VOCs studied. Panels                   |    |
| 97  | a-f: the relative sensitivity was calculated as the slope (sensitivity) under high-RH                        |    |
| 98  | conditions to that at the dry ( $RH < 5\%$ ) condition. Panel g: the percent change of relative              |    |
| 99  | sensitivity per 10% RH increase. ....                                                                        | 21 |
| 100 | Figure S16. The dependence of the $[MH-H_2O]^+$ signals on RH for the VOCs and OVOCs.                        |    |
| 101 | Panels a-d: the relative sensitivity was calculated as the slope (sensitivity) under high-RH                 |    |
| 102 | conditions to that at the dry ( $RH < 5\%$ ) condition. Panel e: the percent change of relative              |    |
| 103 | sensitivity per 10% RH increase. ....                                                                        | 22 |
| 104 | Figure S17. The dependence of the $[MH-C_xH_y]^+$ signals on RH for the VOCs and OVOCs                       |    |
| 105 | tested at a concentration of $\sim 12$ ppbv. Panels a-e: the relative sensitivity was calculated as          |    |
| 106 | the slope (sensitivity) under high-RH conditions to that at the dry ( $RH < 5\%$ ) condition.                |    |
| 107 | Panel f: the percent change of relative sensitivity per 10% RH increase. ....                                | 23 |

110 **Tables.**

111 **Table S1.** The details of instrument setting experiments.

| Varying setting | Vocus front (volt) | Vocus back (volt) | pressure (mbar) | E/N (Td)  | BSQ (volt) | RF (volt) |
|-----------------|--------------------|-------------------|-----------------|-----------|------------|-----------|
| E               | 300 to 700         | 34                | 2               | 48 to 142 | 260        | 500       |
| N               | 500                | 34                | 1.5 to 3.5      | 57 to 133 | 260        | 500       |
| RF              | 700                | 34                | 2               | 171       | 260        | 500 to 13 |
| BSQ             | 700                | 34                | 2               | 171       | 300 to 50  | 500       |
| RF              | 700                | 34                | 3.5             | 98        | 260        | 500 to 13 |
| BSQ             | 700                | 34                | 3.5             | 98        | 300 to 50  | 500       |

112

**Table S2.** Details of the tested volatile organic compounds (VOCs). Also shown are their proton affinity (PA) values.

| Group <sup>a</sup> | Name                   | CAS#     | m/Q (Th) <sup>b</sup> |          | PA<br>(kJ mol <sup>-1</sup> ) <sup>c</sup> |
|--------------------|------------------------|----------|-----------------------|----------|--------------------------------------------|
|                    |                        |          | Exact                 | Measured |                                            |
| A1                 | Benzene                | 71-43-2  | 79.0542               | 79.0548  | 750.4                                      |
|                    | Toluene                | 108-88-3 | 93.0699               | 93.0699  | 784                                        |
|                    | m-Xylene               | 108-38-3 | 107.0855              | 107.0859 | 812.1                                      |
|                    | 1,2,4-Trimethylbenzene | 95-63-6  | 121.1012              | 121.1007 | 798.3                                      |
| A2                 | Isoprene               | 78-79-5  | 69.0699               | 69.0709  | 826.4                                      |
|                    | $\alpha$ -Pinene       | 80-56-8  | 137.1325              | 137.1321 | 878.6 <sup>d</sup>                         |
|                    | $\beta$ -Caryophyllene | 87-44-5  | 205.1951              | 205.198  | 859.2 <sup>e</sup>                         |
| B1                 | Formaldehyde           | 50-00-0  | 31.0178               | 31.0171  | 712.5                                      |
|                    | Acetaldehyde           | 75-07-0  | 45.0335               | 45.0329  | 768.5                                      |
| B2                 | n-Butanal              | 123-72-8 | 73.0648               | 73.0656  | 792.7                                      |
|                    | Pentanal               | 110-62-3 | 87.0804               | 87.0802  | 796.6                                      |
|                    | Hexaldehyde            | 66-25-1  | 101.0961              | 101.0957 | 794.4~797 <sup>f</sup>                     |
| B3                 | Acetone                | 67-64-1  | 59.0491               | 59.0491  | 812                                        |
|                    | Methyl ethyl Ketone    | 78-93-3  | 73.0648               | 73.0656  | 827.3                                      |
| B4                 | Acrolein               | 107-02-8 | 57.0335               | 57.0332  | 797                                        |
|                    | Methacrolein           | 78-85-3  | 71.0491               | 71.0495  | 808.7                                      |
| B5                 | Benzaldehyde           | 100-52-1 | 107.0491              | 107.0504 | 834                                        |
|                    | m-Tolualdehyde         | 620-23-5 | 121.0648              | 121.0651 | 840                                        |
| C1                 | Acetonitrile           | 75-05-8  | 42.0338               | 42.0329  | 779.2                                      |
|                    | Acrylonitrile          | 107-13-1 | 54.0338               | 54.0334  | 784.7                                      |
| C2                 | Methanol               | 67-56-1  | 33.0335               | 33.0323  | 754.3                                      |

Notes:

a, A1: aromatic hydrocarbons, A2: terpenoids, B1: small aldehydes; B2: long-chain aldehydes, B3: ketones, B4: unsaturated aldehydes, B5: aromatic aldehydes, C1: nitriles, C2: methanol;

b, mass-to-charge ratio of protonated ion MH<sup>+</sup>;

c, taken from NIST Chemistry WebBook William E. Acree and Chickos (2023), unless stated otherwise;

d, from Solouki and Szulejko (2007); e, from Jenkin et al. (2012); f, from Blake et al. (2008).

122 **Table S3.** Proton-transfer reaction rate constants ( $k_{\text{ptr}}, \times 10^{-9} \text{ cm}^3 \text{ molec}^{-1} \text{ s}^{-1}$ ) from literature.

| Group | Name                   | $k_{\text{model}}^{\text{a}}$ |      | $k_{\text{experiment}}^{\text{b}}$ |     |      |     | $N^{\text{c}}$ | $k_{\text{avg}}^{\text{d}}$ | $k_{\text{std}}^{\text{e}}$ |
|-------|------------------------|-------------------------------|------|------------------------------------|-----|------|-----|----------------|-----------------------------|-----------------------------|
| A1    | Benzene                | 1.97                          | 1.8  | 1.9                                | 2.1 | 1.85 | —   | 5              | 1.92                        | 0.13                        |
|       | Toluene                | 2.12                          | 2.05 | 1.9                                | 2.2 | 2.3  | —   | 5              | 2.11                        | 0.14                        |
|       | m-Xylene               | 2.26                          | 2.3  | —                                  | —   | —    | —   | 2              | 2.28                        | 0.24                        |
|       | 1,2,4-Trimethylbenzene | 2.4                           | 2.4  | —                                  | —   | —    | —   | 2              | 2.4                         | 0.25                        |
| A2    | Isoprene               | 1.94                          | 1.3  | 2                                  | 2   | 1.7  | 2.1 | 6              | 1.84                        | 0.12                        |
|       | $\alpha$ -Pinene       | 2.44                          | 2.2  | 2.6                                | —   | —    | —   | 3              | 2.41                        | 0.22                        |
|       | $\beta$ -Caryophyllene | 3.1                           | —    | —                                  | —   | —    | —   | 1              | 3.1                         | 0.47                        |
| B1    | Formaldehyde           | 3                             | 3.4  | —                                  | —   | —    | —   | 2              | 3.2                         | 0.35                        |
|       | Acetaldehyde           | 3.36                          | 3.5  | 3.6                                | 3.7 | —    | —   | 4              | 3.54                        | 0.27                        |
| B2    | n-Butanal              | 3.49                          | 3.8  | —                                  | —   | —    | —   | 2              | 3.65                        | 0.39                        |
|       | Pentanal               | 3.34                          | 3.6  | —                                  | —   | —    | —   | 2              | 3.47                        | 0.37                        |
|       | Hexaldehyde            | 3.74                          | 3.7  | —                                  | —   | —    | —   | 2              | 3.72                        | 0.39                        |
| B3    | Acetone                | 3                             | 2.4  | 3.59                               | 3.9 | 4.1  | —   | 5              | 3.4                         | 0.26                        |
|       | Methyl ethyl Ketone    | 3.83                          | 3.03 | 3.9                                | —   | —    | —   | 3              | 3.59                        | 0.34                        |
| B4    | Acrolein               | 3.35                          | 4.2  | —                                  | —   | —    | —   | 2              | 3.78                        | 0.45                        |
|       | Methacrolein           | 3.55                          | —    | —                                  | —   | —    | —   | 1              | 3.55                        | 0.53                        |
| B5    | Benzaldehyde           | 4.12                          | 3.7  | —                                  | —   | —    | —   | 2              | 3.91                        | 0.43                        |
|       | m-Tolualdehyde         | 4.9                           | 4.1  | —                                  | —   | —    | —   | 2              | 4.5                         | 0.52                        |
| C1    | Acetonitrile           | 4.74                          | 2.7  | 4.7                                | 5.1 | 3.92 | —   | 5              | 4.23                        | 0.33                        |
|       | Acrylonitrile          | 5.1                           | —    | —                                  | —   | —    | —   | 1              | 5.1                         | 0.77                        |
| C2    | Methanol               | 2.33                          | 2.1  | 2.2                                | 2.7 | —    | —   | 4              | 2.33                        | 0.18                        |

Notes:

a, From Zhao and Zhang (2004);

b, From Pagonis et al. (2019) and reference therein, as well as Zhao and Zhang (2004), , Michel et al. (2005), Milligan et al. (2002), Lindinger et al. (1998), Cappellin et al. (2012), Sekimoto et al. (2017);

c, number of values for averaging;

d, averaged  $k_{\text{proton-transfer}}$ ;

e, the uncertainty of  $k_{\text{proton-transfer}}$  by assuming 15% uncertainty for modeled values Zhao and Zhang (2004) as well as experiment values, weighted by the number of values.

132 **Table S4.** The RH dependence, sensitivity, intercept of protonated adducts, and fragmented ions.

| Group | Name                         | [MH+H <sub>2</sub> O] <sup>+</sup> |                    |                          | [MH-H <sub>2</sub> O] <sup>+</sup> |                    |                          | [MH-C <sub>x</sub> H <sub>y</sub> ] <sup>+</sup> |                    |                          | Signal percentage (%) <sup>b</sup> |                                    |                                    |                                                  |
|-------|------------------------------|------------------------------------|--------------------|--------------------------|------------------------------------|--------------------|--------------------------|--------------------------------------------------|--------------------|--------------------------|------------------------------------|------------------------------------|------------------------------------|--------------------------------------------------|
|       |                              | Sensitivity<br>(cps/ppbv)          | Intercept<br>(cps) | RH-<br>dependence<br>(%) | Sensitivity<br>(cps/ppbv)          | Intercept<br>(cps) | RH-<br>dependence<br>(%) | Sensitivity<br>(cps/ppbv)                        | Intercept<br>(cps) | RH-<br>dependence<br>(%) | MH <sup>+</sup>                    | [MH+H <sub>2</sub> O] <sup>+</sup> | [MH-H <sub>2</sub> O] <sup>+</sup> | [MH-C <sub>x</sub> H <sub>y</sub> ] <sup>+</sup> |
| A1    | Benzene                      | — <sup>a</sup>                     | —                  | —                        | —                                  | —                  | —                        | —                                                | —                  | —                        | 100                                | —                                  | —                                  | —                                                |
|       | Toluene                      | —                                  | —                  | —                        | —                                  | —                  | —                        | 153.7                                            | 52.7               | -1.5                     | 98                                 | —                                  | —                                  | 2                                                |
|       | m-Xylene                     | —                                  | —                  | —                        | —                                  | —                  | —                        | 2903.7                                           | -168.1             | -0.8                     | 76                                 | —                                  | —                                  | 24                                               |
|       | 1,2,4-Trimethylbenzene       | —                                  | —                  | —                        | —                                  | —                  | —                        | 1219.8                                           | -185.5             | -0.4                     | 88                                 | —                                  | —                                  | 12                                               |
| A2    | Isoprene                     | —                                  | —                  | —                        | —                                  | —                  | —                        | 154.4                                            | 211.9              | -1.1                     | 93                                 | —                                  | —                                  | 7                                                |
|       | α-Pinene                     | —                                  | —                  | —                        | —                                  | —                  | —                        | 4171.2                                           | 1437.7             | 0.2                      | 46                                 | —                                  | —                                  | 54                                               |
|       | β-Caryophyllene              | 1.4                                | 1.7                | 3.5                      | —                                  | —                  | —                        | —                                                | —                  | —                        | 100                                | —                                  | —                                  | <<1 <sup>d</sup>                                 |
| B1    | Formaldehyde                 | —                                  | —                  | —                        | —                                  | —                  | —                        | —                                                | —                  | —                        | 100                                | —                                  | —                                  | —                                                |
|       | Acetaldehyde I <sup>c</sup>  | —                                  | —                  | —                        | 0.1                                | 0.6                | -0.79                    | —                                                | —                  | —                        | 100                                | —                                  | <<1 <sup>d</sup>                   | —                                                |
|       | Acetaldehyde II <sup>c</sup> | —                                  | —                  | —                        | 0.2                                | 0.6                | 0.67                     | —                                                | —                  | —                        | 100                                | —                                  | <<1 <sup>d</sup>                   | —                                                |
| B2    | n-Butanal                    | 201.4                              | 327.5              | 5.1                      | 5589.1                             | 13531              | 0.02                     | —                                                | —                  | —                        | 23                                 | 3                                  | 75                                 | ? <sup>e</sup>                                   |
|       | Pentanal                     | 1300.1                             | 1617.1             | 1.4                      | 4116.6                             | 816.3              | 0.29                     | —                                                | —                  | —                        | 24                                 | 7                                  | 69                                 | ?                                                |
|       | Hexaldehyde                  | 367                                | 399.3              | 8.2                      | 367                                | 399.3              | 0.30                     | 84                                               | 1203.6             | 0.6                      | 20                                 | 6                                  | 72                                 | 2                                                |
| B3    | Acetone I <sup>c</sup>       | 58                                 | 433                | 5.4                      | 288.1                              | 635                | 0.37                     | 131                                              | 5939.7             | -3.0                     | 91                                 | 1                                  | 3                                  | 5                                                |
|       | Acetone II <sup>c</sup>      | 64.5                               | 444.3              | 5.3                      | 603.5                              | 556.6              | 0.38                     | 170.9                                            | 5674.8             | -2.1                     | 91                                 | 1                                  | 3                                  | 5                                                |
|       | Methyl ethyl Ketone          | 273.4                              | 178.3              | 2.8                      | 1084.3                             | 13728.2            | -0.92                    | 208.2                                            | 2614.9             | 0.2                      | 77                                 | 2                                  | 17                                 | 2                                                |
| B4    | Acrolein                     | 49.7                               | 4057               | 2.3                      | 268.7                              | 339.2              | 0.47                     | —                                                | —                  | —                        | 91                                 | 5                                  | 4                                  | —                                                |
|       | Methacrolein                 | 385.5                              | 746.5              | 2.3                      | 217.5                              | 176.6              | -0.19                    | —                                                | —                  | —                        | 90                                 | 7                                  | 3                                  | —                                                |
| B5    | Benzaldehyde                 | 774.9                              | -457.7             | 2.7                      | —                                  | —                  | —                        | —                                                | —                  | —                        | 95                                 | 5                                  | —                                  | —                                                |
|       | m-Tolualdehyde               | 985                                | -956.1             | 2.4                      | —                                  | —                  | —                        | 1261                                             | 742.5              | -2.4                     | 87                                 | 8                                  | —                                  | 6                                                |
| C1    | Acetonitrile                 | 46.2                               | 1199.8             | 8.5                      | —                                  | —                  | —                        | —                                                | —                  | —                        | 93                                 | 7                                  | —                                  | —                                                |
|       | Acrylonitrile                | 118.2                              | 111                | 5.2                      | —                                  | —                  | —                        | —                                                | —                  | —                        | 99                                 | 1                                  | —                                  | —                                                |
| C2    | Methanol                     | 40.7                               | 0.69               | 1.9                      | —                                  | —                  | —                        | —                                                | —                  | —                        | 3                                  | 97                                 | —                                  | —                                                |

133 Notes:

134 a, not available;

135 b, the specific percentage of fragment or adducted ion signals on all ion signals;

136 c, from gas standard cylinders I and II.

137 d, far less than 1 and closer to zero;

138 e, not determined due to overlapping signals.

**Figures.**

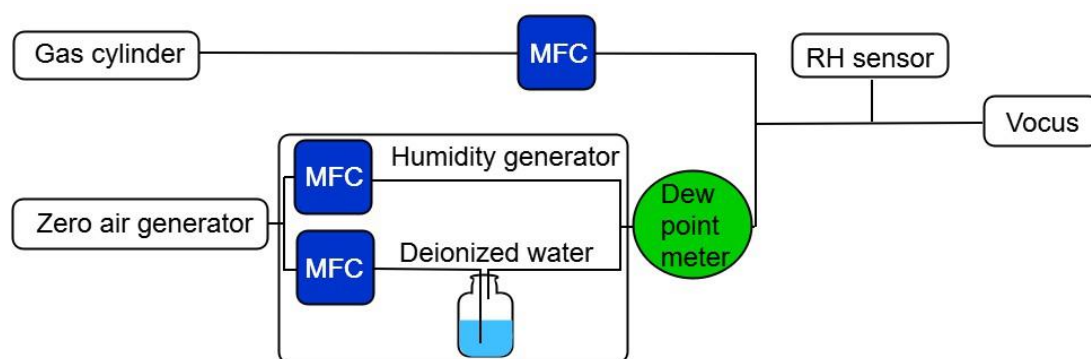

**Figure S1.** The diagram of the RH experimental setup. MFC: mass flow controller.



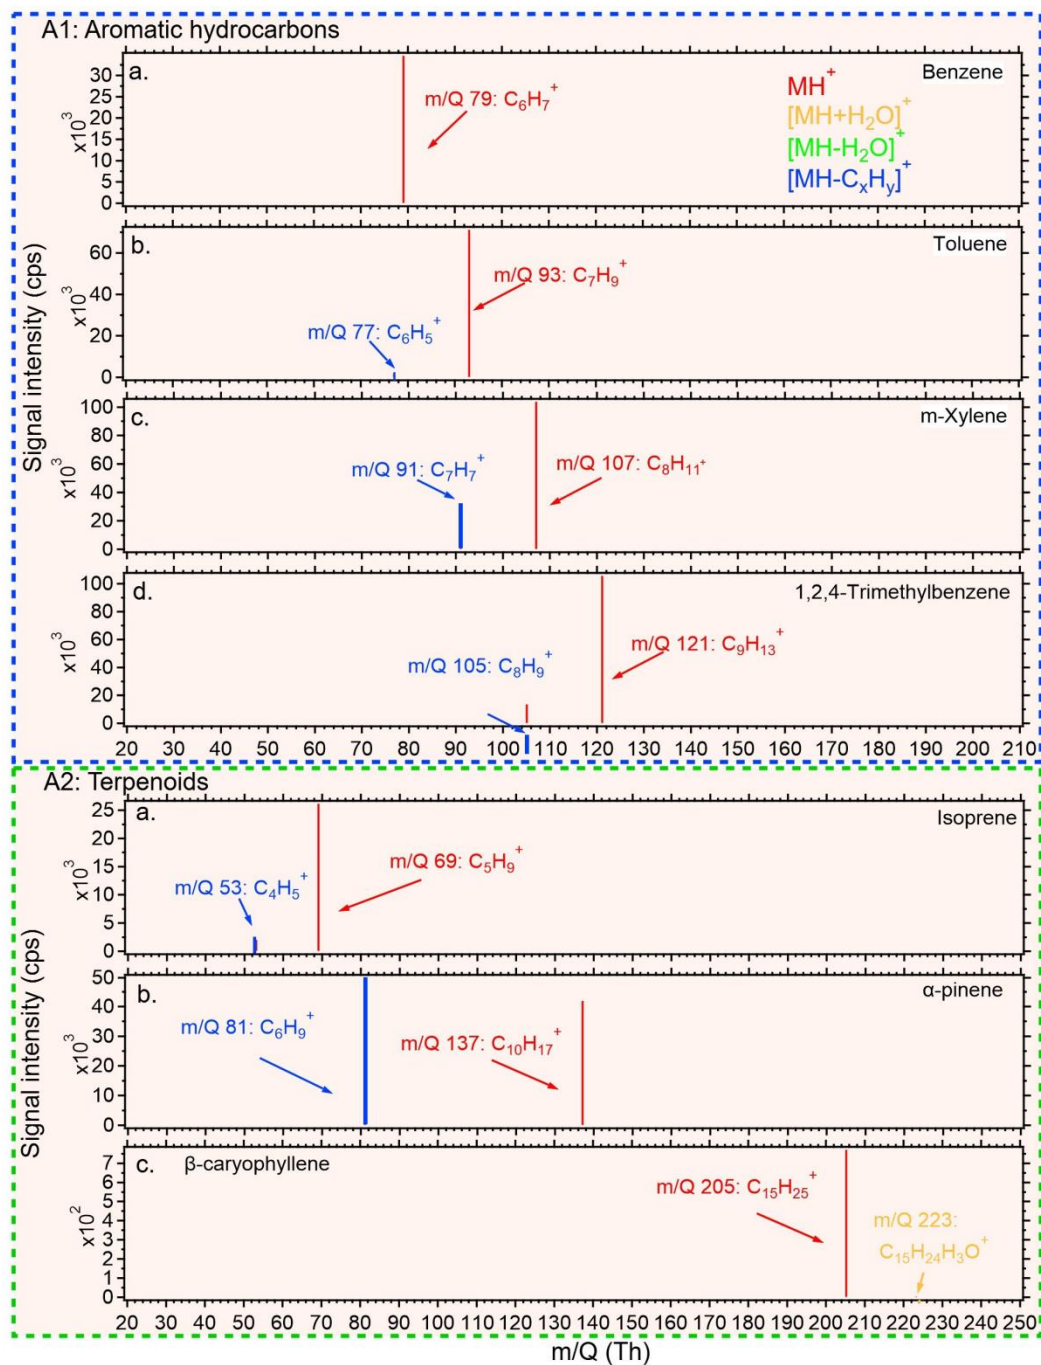

**Figure S2.** The mass spectra of aromatic hydrocarbons (benzene, toluene, m-xylene, and 1,2,4-trimethylbenene), and terpenoids (isoprene,  $\alpha$ -pinene, and  $\beta$ -caryophyllene) in Vocus at a mixing ratio of  $\sim 12$  ppbv ( $\beta$ -caryophyllene 1.2 ppbv).

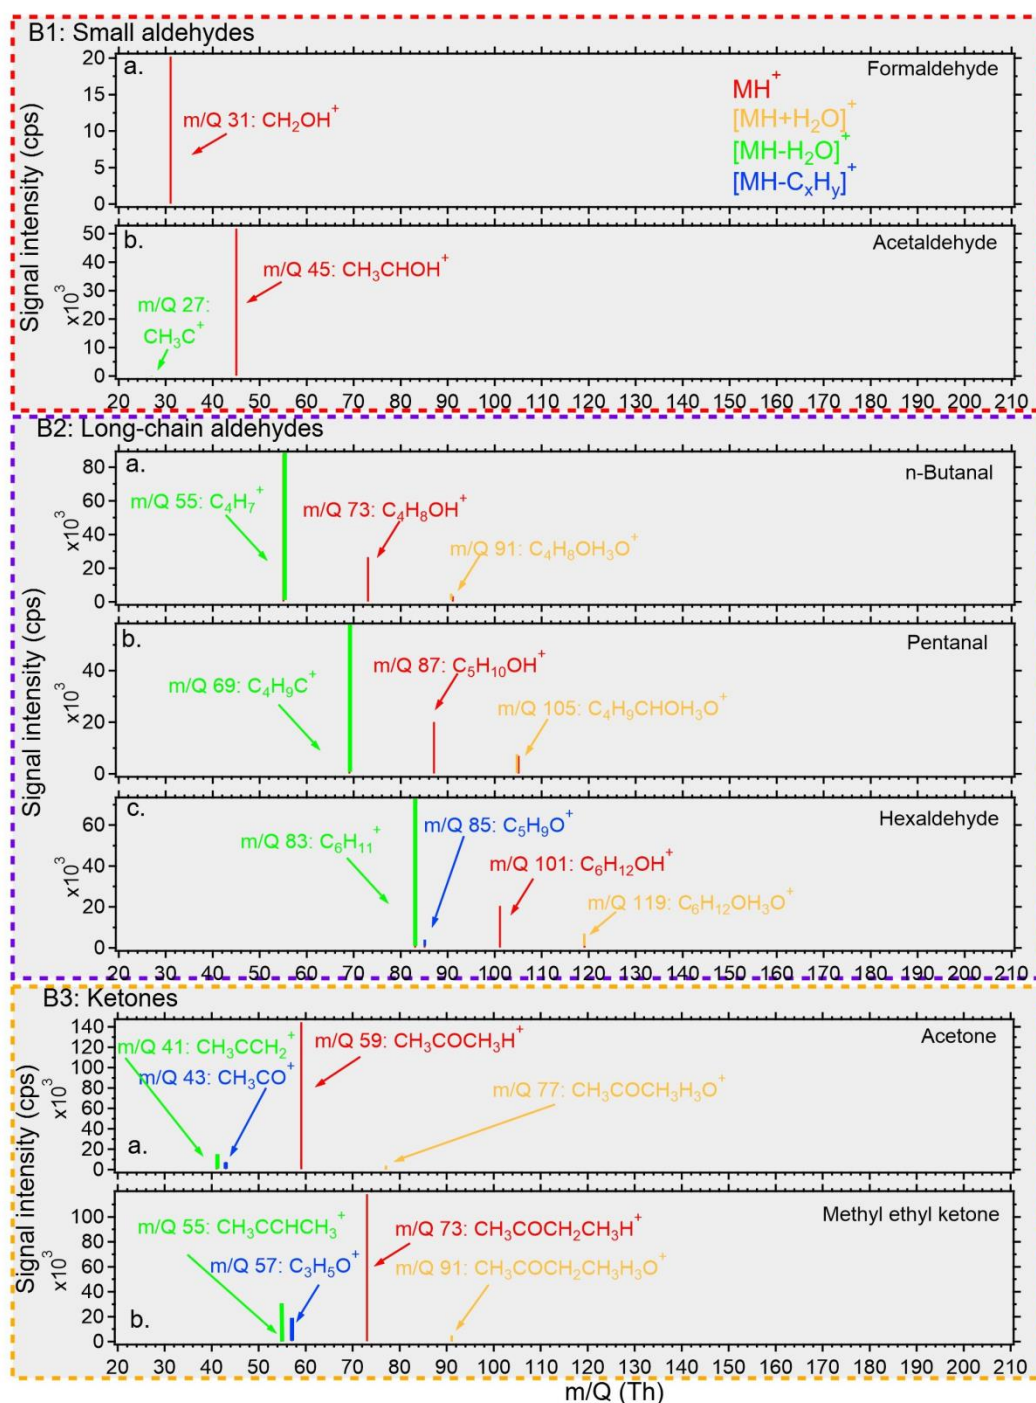

**Figure S3.** The mass spectra of small aldehydes (formaldehyde and acetaldehyde), long-chain aldehydes (n-butanal, pentanal, and hexaldehyde), and ketones (acetone, and methyl ethyl ketone) in Vocus at a mixing ratio of  $\sim 12$  ppbv.

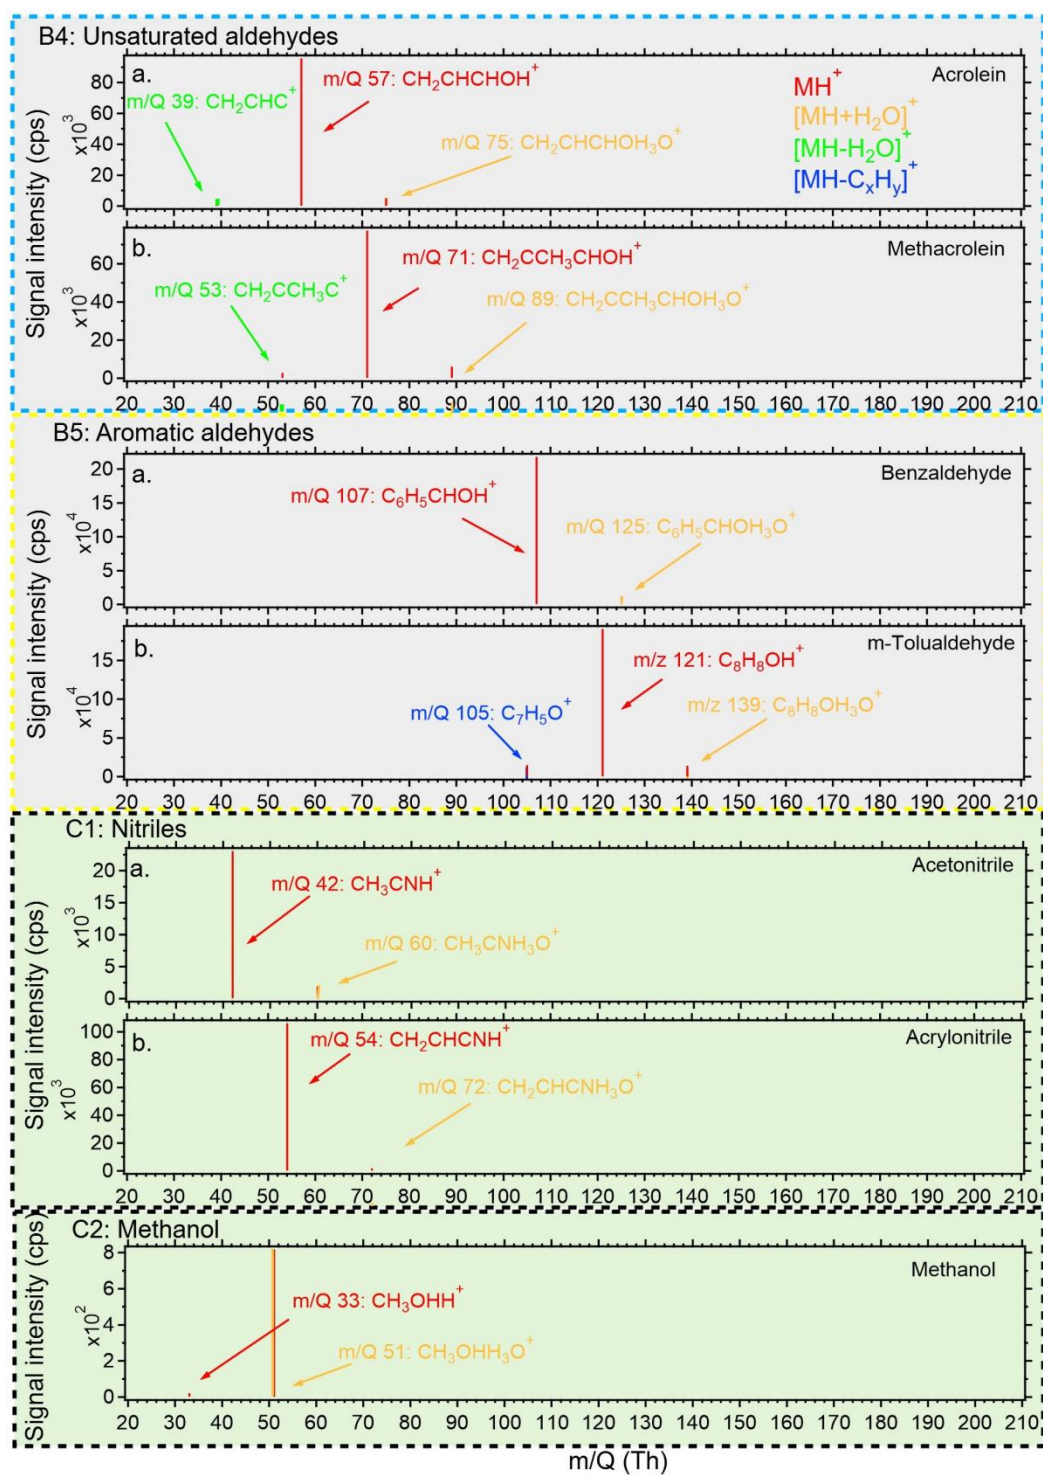

**Figure S4.** The mass spectra of unsaturated aldehydes (acrolein and methacrolein), aromatic aldehydes (benzaldehyde and m-tolualdehyde), nitriles (acetonitrile and acrylonitrile), and methanol in Vocus at a mixing ratio of  $\sim 12$  ppbv.

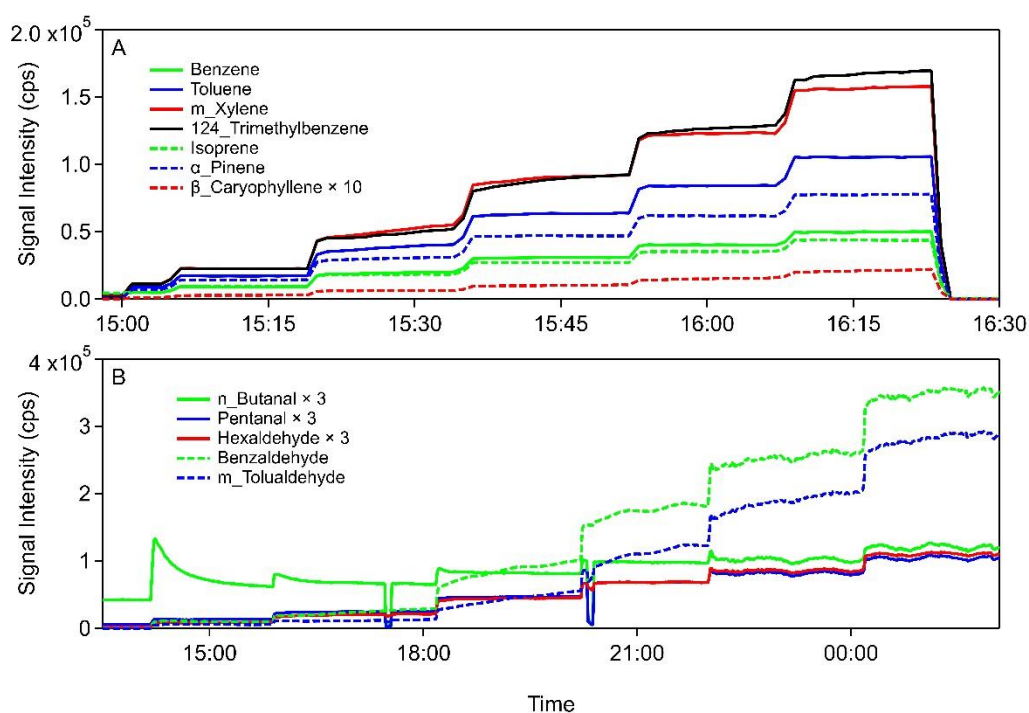

**Figure S5.** Time series of the protonated ion ( $MH^+$ ) signals for selected (A) VOCs and (B) OVOCs as concentration varied from 0 to  $\sim 22$  ppbv ( $\sim 2$  ppbv for  $\beta$  caryophyllene) under dry ( $MH \sim 5\%$ ) conditions. Note the signals were magnified by 10 times for  $\beta$ -caryophyllene and 3 times for n-butanal, pentanal, and hexaldehyde.



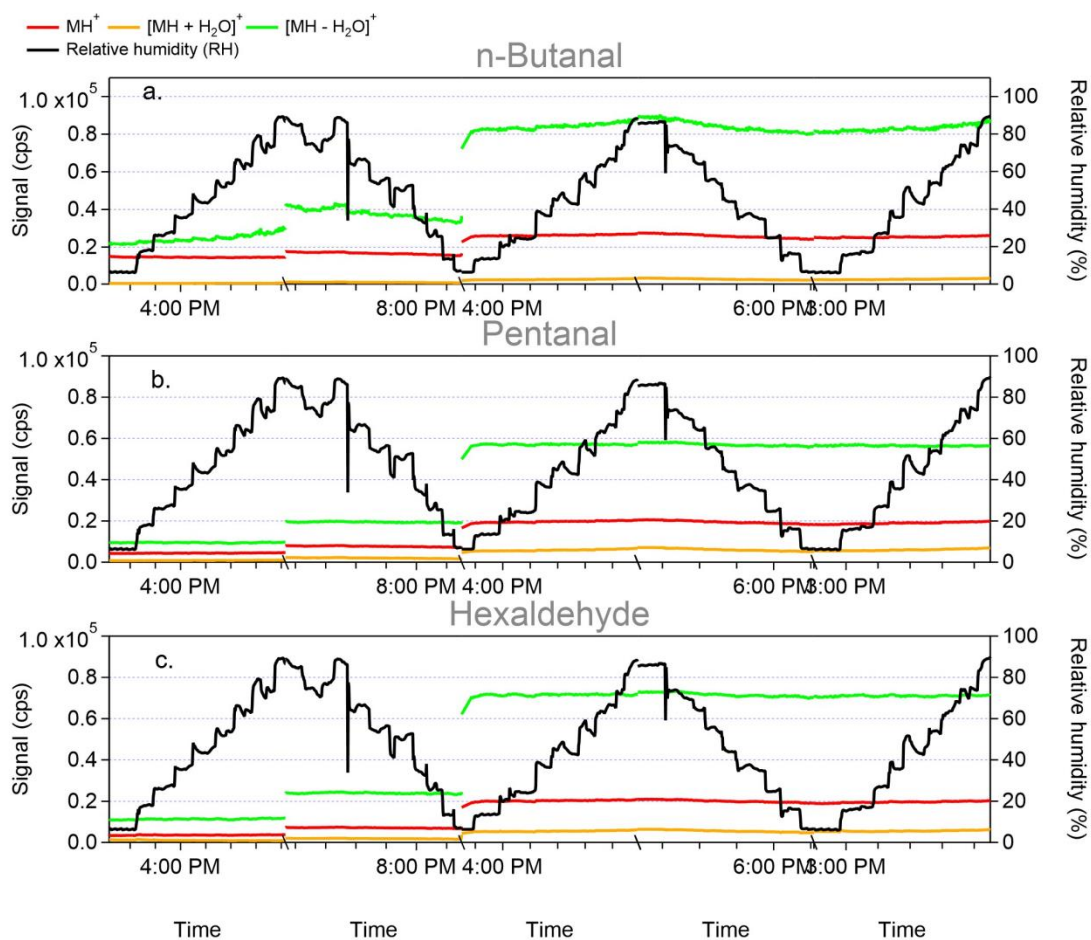

**Figure S6.** Time series of the protonated ion ( $\text{MH}^+$ ), adduct ions ( $[\text{MH} + \text{H}_2\text{O}]^+$ ), and fragmented ions ( $[\text{MH} - \text{H}_2\text{O}]^+$ ) and/or ( $[\text{MH} - \text{C}_x\text{H}_y]^+$ ) signals for n-butanal, pentanal, and hexaldehyde. Note that the time in x axis is not continuous, with some periods with noisy signals cut off.

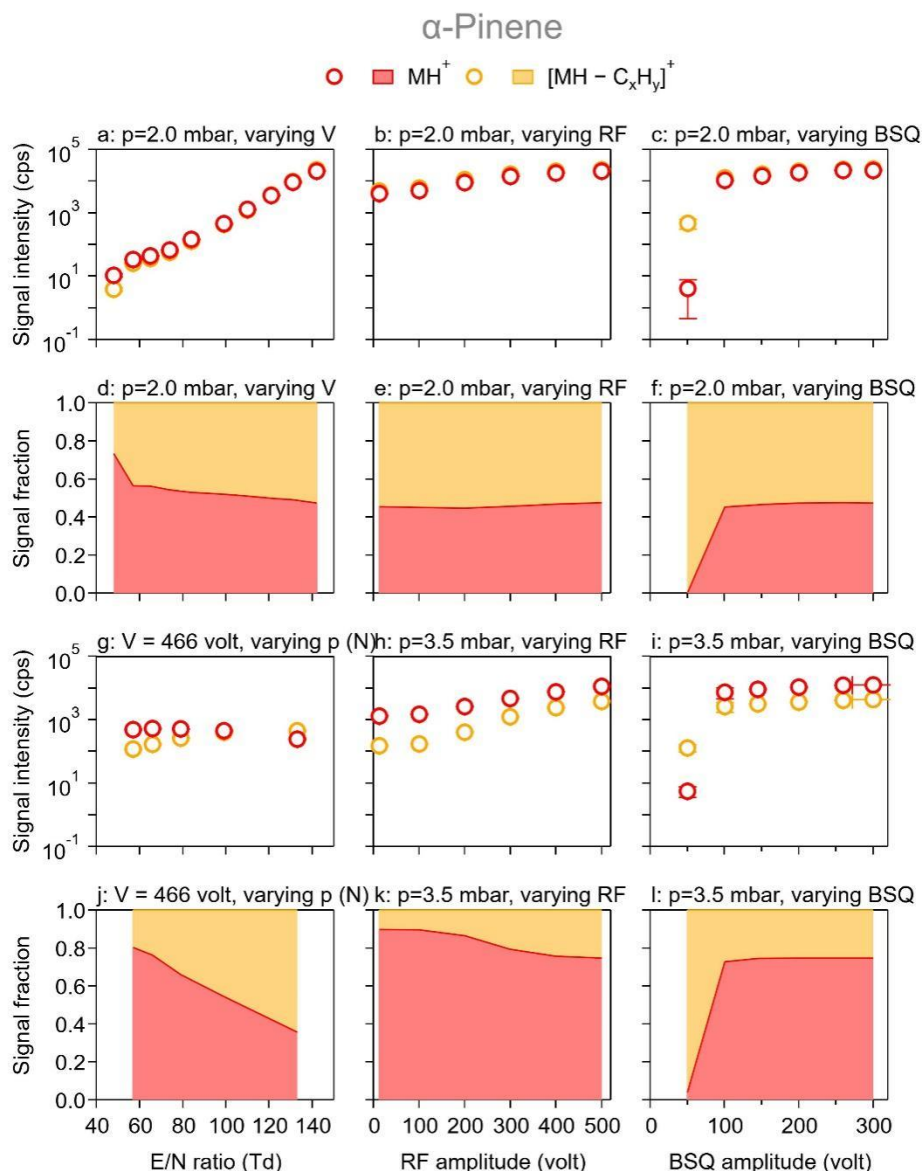

**Figure S7.** The signal intensities (panels a, b, and c, and panels g, h, and i) and fractions (panels d, e, and f, and panels j, k, and l) of protonated ion ( $\text{MH}^+$ ), adduct ions ( $[\text{MH} + \text{H}_2\text{O}]^+$ ), and fragmented ions ( $[\text{MH} - \text{H}_2\text{O}]^+$  and  $[\text{MH} - \text{C}_x\text{H}_y]^+$ ) for  $\alpha$ -pinene as functions of E/N ratio (a, d, g, and j), RF amplitude (b, e, h, and k), and BSQ amplitude (c, f, i, and l). The difference between a/d and g/j is that the former fixed N ( $p = 2.0$  mbar) and varied axial voltage (V) to change E/N ratio, while the latter fixed V (= 466 volts) and varied  $p$  (i.e., N) to change E/N ratio. The difference between b/e and h/k and between c/f and i/l is that the former was at  $p = 2.0$  mbar while the latter  $p = 3.5$  mbar. If not varied, RF amplitude was set at 500 volts and BSQ amplitude at 300 volts.

# 1,2,4-Trimethylbenzene

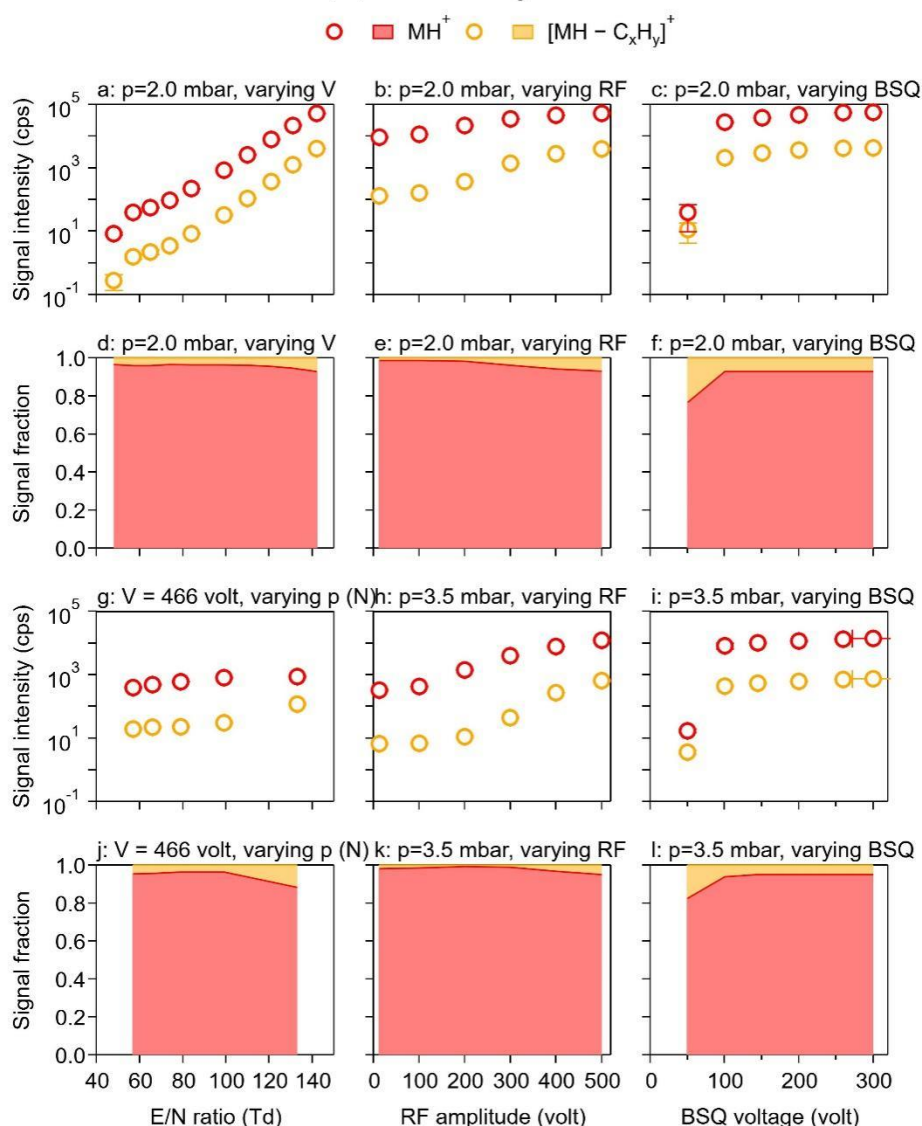

**Figure S8.** The signal intensities (panels a, b, and c, and panels g, h, and i) and fractions (panels d, e, and f, and panels j, k, and l) of protonated ion ( $\text{MH}^+$ ), adduct ions ( $[\text{MH} + \text{H}_2\text{O}]^+$ ), and fragmented ions ( $[\text{MH} - \text{H}_2\text{O}]^+$  and  $[\text{MH} - \text{C}_x\text{H}_y]^+$ ) for 1,2,4-trimethylbenzene as functions of E/N ratio (a, d, g, and j), RF amplitude (b, e, h, and k), and BSQ amplitude (c, f, i, and l). The difference between a/d and g/j is that the former fixed N ( $p = 2.0$  mbar) and varied axial voltage (V) to change E/N ratio, while the latter fixed V (= 466 volts) and varied p (i.e., N) to change E/N ratio. The difference between b/e and h/k and between c/f and i/l is that the former was at  $p = 2.0$  mbar while the latter  $p = 3.5$  mbar. If not varied, RF amplitude was set at 500 volts and BSQ amplitude at 300 volts.

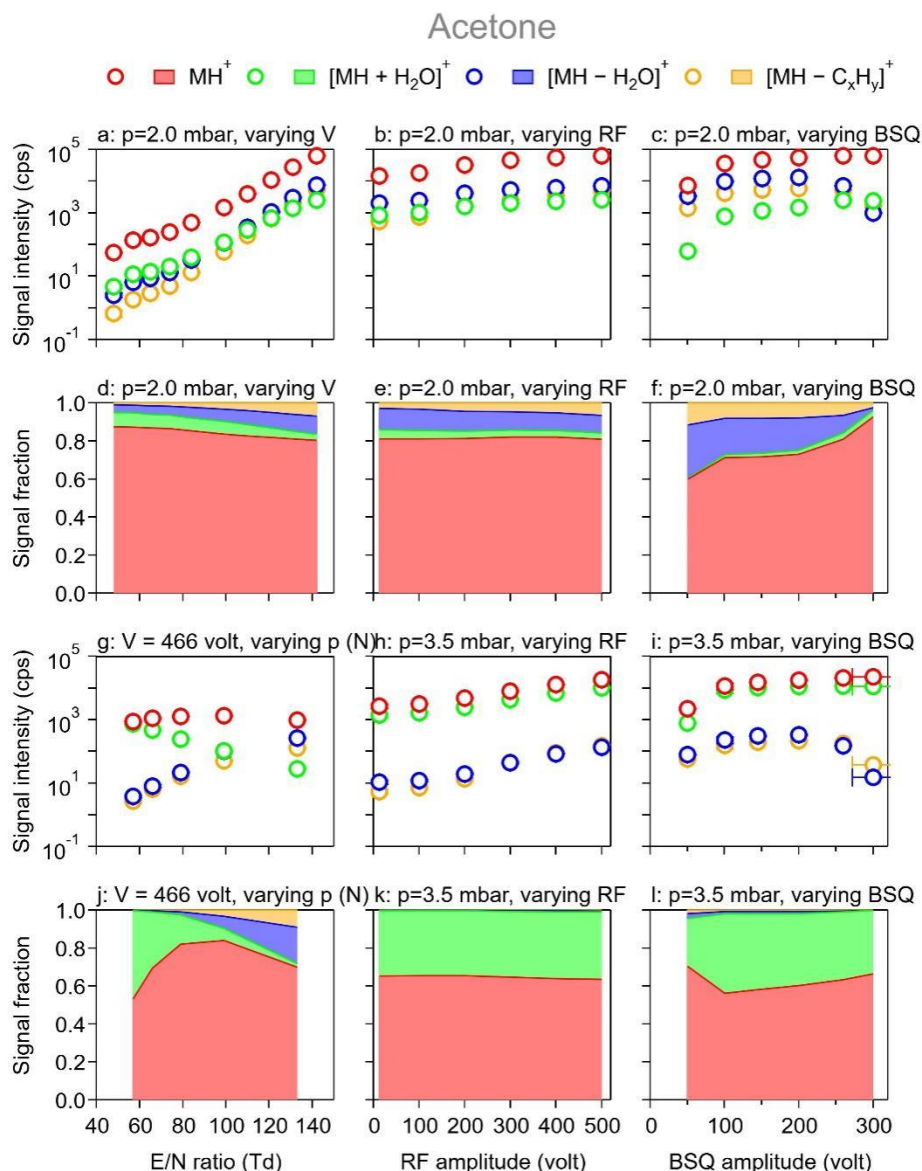

**Figure S9.** The signal intensities (panels a, b, and c, and panels g, h, and i) and fractions (panels d, e, and f, and panels j, k, and l) of protonated ion ( $\text{MH}^+$ ), adduct ions ( $[\text{MH} + \text{H}_2\text{O}]^+$ ), and fragmented ions ( $[\text{MH} - \text{H}_2\text{O}]^+$  and  $[\text{MH} - \text{C}_x\text{H}_y]^+$ ) for acetone as functions of E/N ratio (a, d, g, and j), RF amplitude (b, e, h, and k), and BSQ amplitude (c, f, i, and l). The difference between a/d and g/j is that the former fixed N ( $p = 2.0$  mbar) and varied axial voltage (V) to change E/N ratio, while the latter fixed V (= 466 volts) and varied p (i.e., N) to change E/N ratio. The difference between b/e and h/k and between c/f and i/l is that the former was at  $p = 2.0$  mbar while the latter  $p = 3.5$  mbar. If not varied, RF amplitude was set at 500 volts and BSQ amplitude at 300 volts.





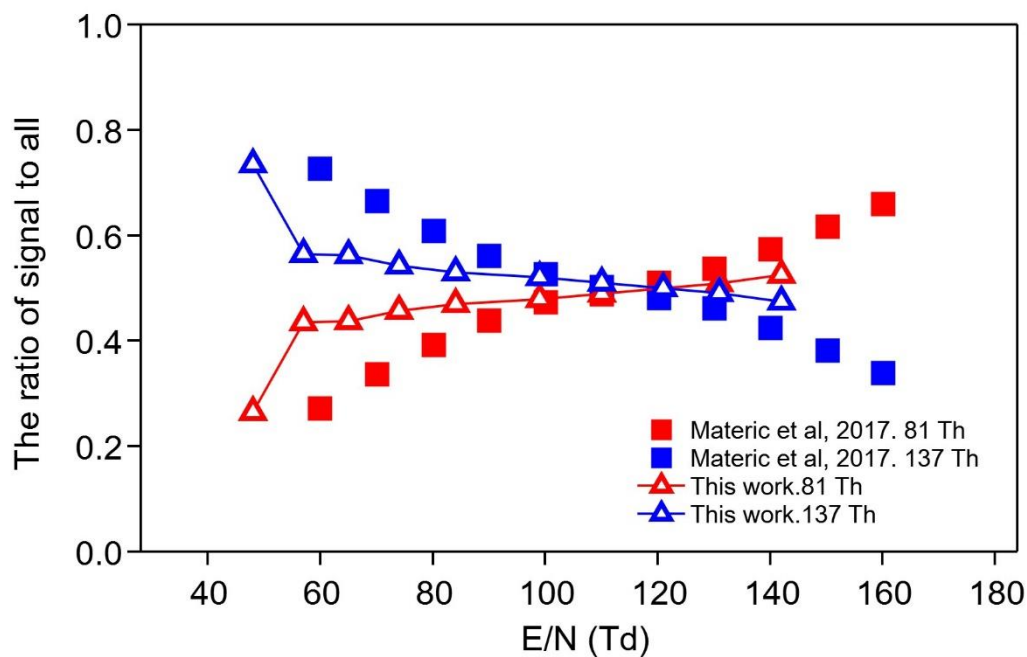

**Figure S11.** The ratio of  $\alpha$ -pinene signals ( $MH^+$ : 137 Th;  $[MH - C_xH_y]^+$ : 81 Th) to all ion signals. This was used to estimate the E/N ratio.

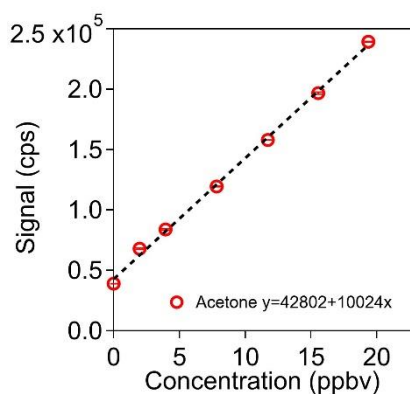

**Figure S12.** The sensitivity of acetone. An intercept above zero indicates a high background value.

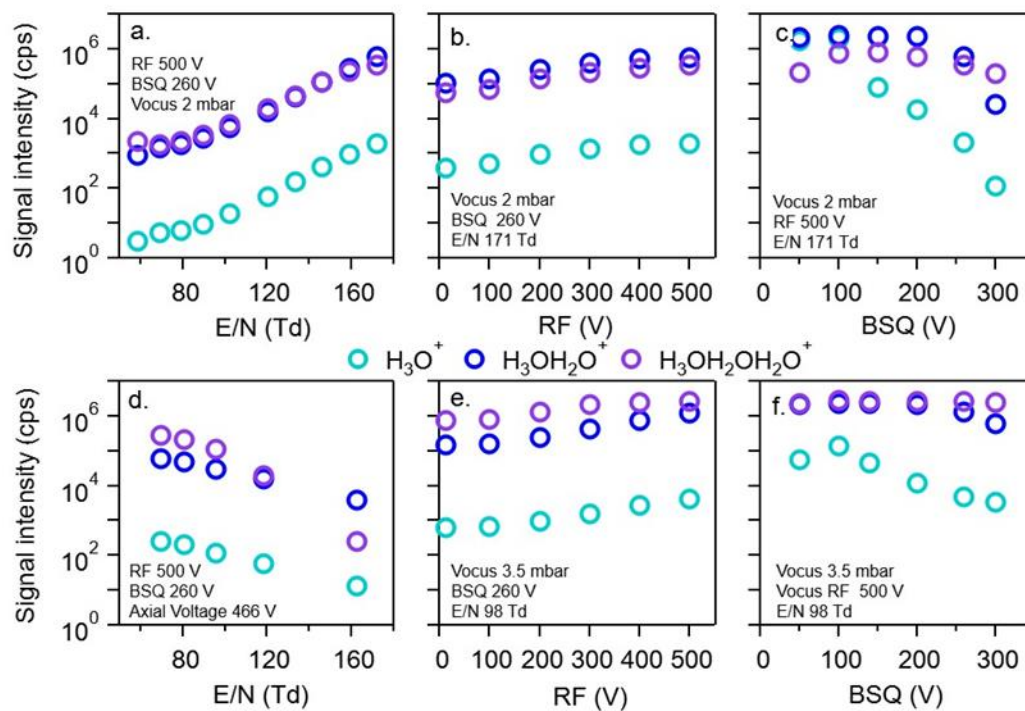

**Figure S13.** The signal intensities of  $\text{H}_3\text{O}^+$ ,  $\text{H}_3\text{OH}_2\text{O}^+$ , and  $\text{H}_3\text{O}(\text{H}_2\text{O})_2^+$  as conditions varied as in Figures 3 in the main text and S14 below.

■ Aromatic hydrocarbons 
 ■ Terpenoids 
 ■ Small aldehydes 
 ■ Long-chain aldehydes 
 ■ Ketones 
 ■ Unsaturated aldehydes 
 ■ Aromatic aldehydes 
 ■ Nitriles 
 ■ Methanol

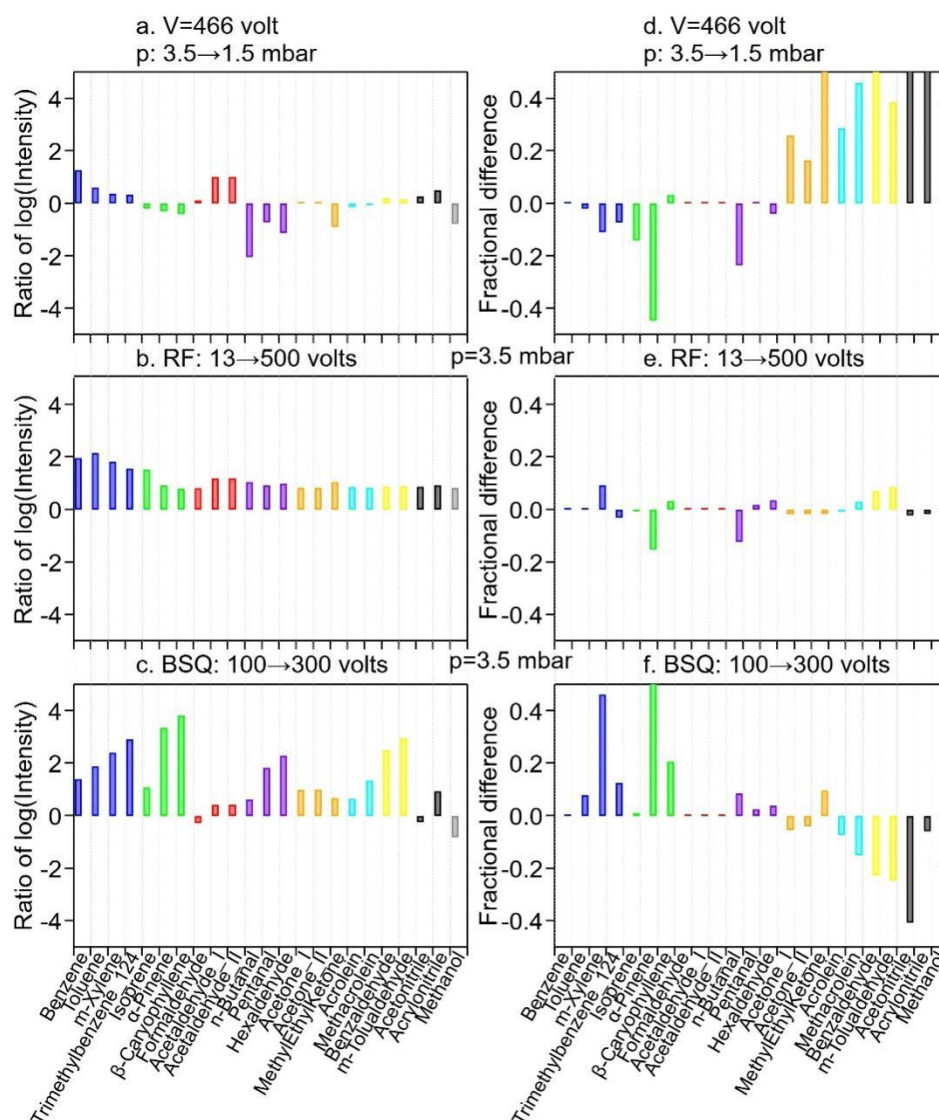

**Figure S14.** The ratio of the logarithm of intensity (panels a, b, and c) and the difference of fractional signal of the protonated ion ( $MH^+$ ) among all ions (panels d, e, and f), when changing axial voltage (V) or FIMR pressure (p) (panels a and d), RF amplitude (panels b and e), and BSQ amplitude (panels c and f). The ratios were taken after taking the logarithm of the signal intensities of  $MH^+$  at the right-hand side of the instrument setting (after the arrow) to that at the left-hand side of the instrument setting stated in the panel label; likewise, the fractional differences are the fractions of the  $MH^+$  signal among the protonated, fragmented, and adduct signals under these two instrumental settings.

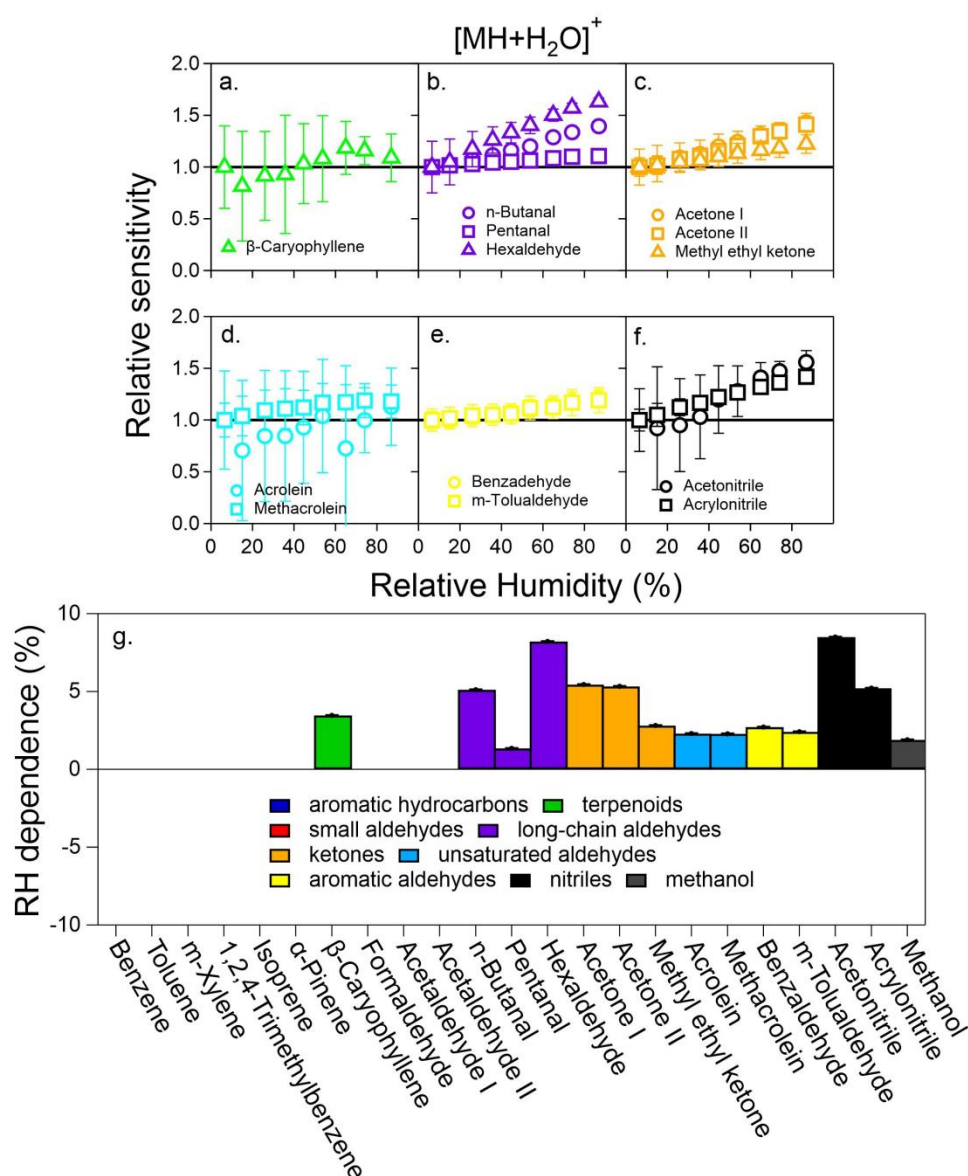

**Figure S15.** The dependence of the  $[MH+H_2O]^+$  signals on RH for the VOCs studied. Panels a-f: the relative sensitivity was calculated as the slope (sensitivity) under high-RH conditions to that at the dry (RH<5%) condition. Panel g: the percent change of relative sensitivity per 10% RH increase.

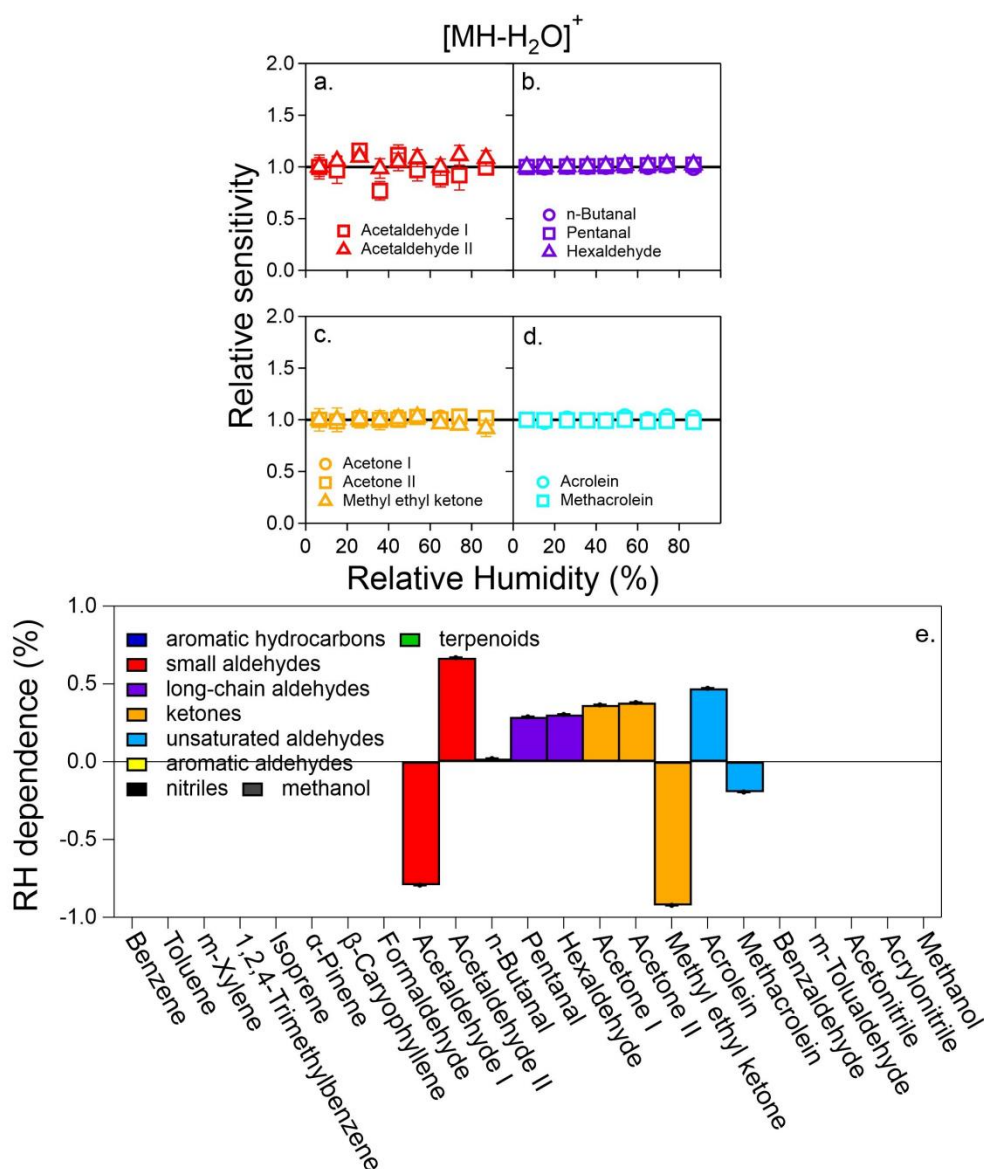

**Figure S16.** The dependence of the  $[MH-H_2O]^+$  signals on RH for the VOCs and OVOCs. Panels a-d: the relative sensitivity was calculated as the slope (sensitivity) under high-RH conditions to that at the dry (RH<5%) condition. Panel e: the percent change of relative sensitivity per 10% RH increase.



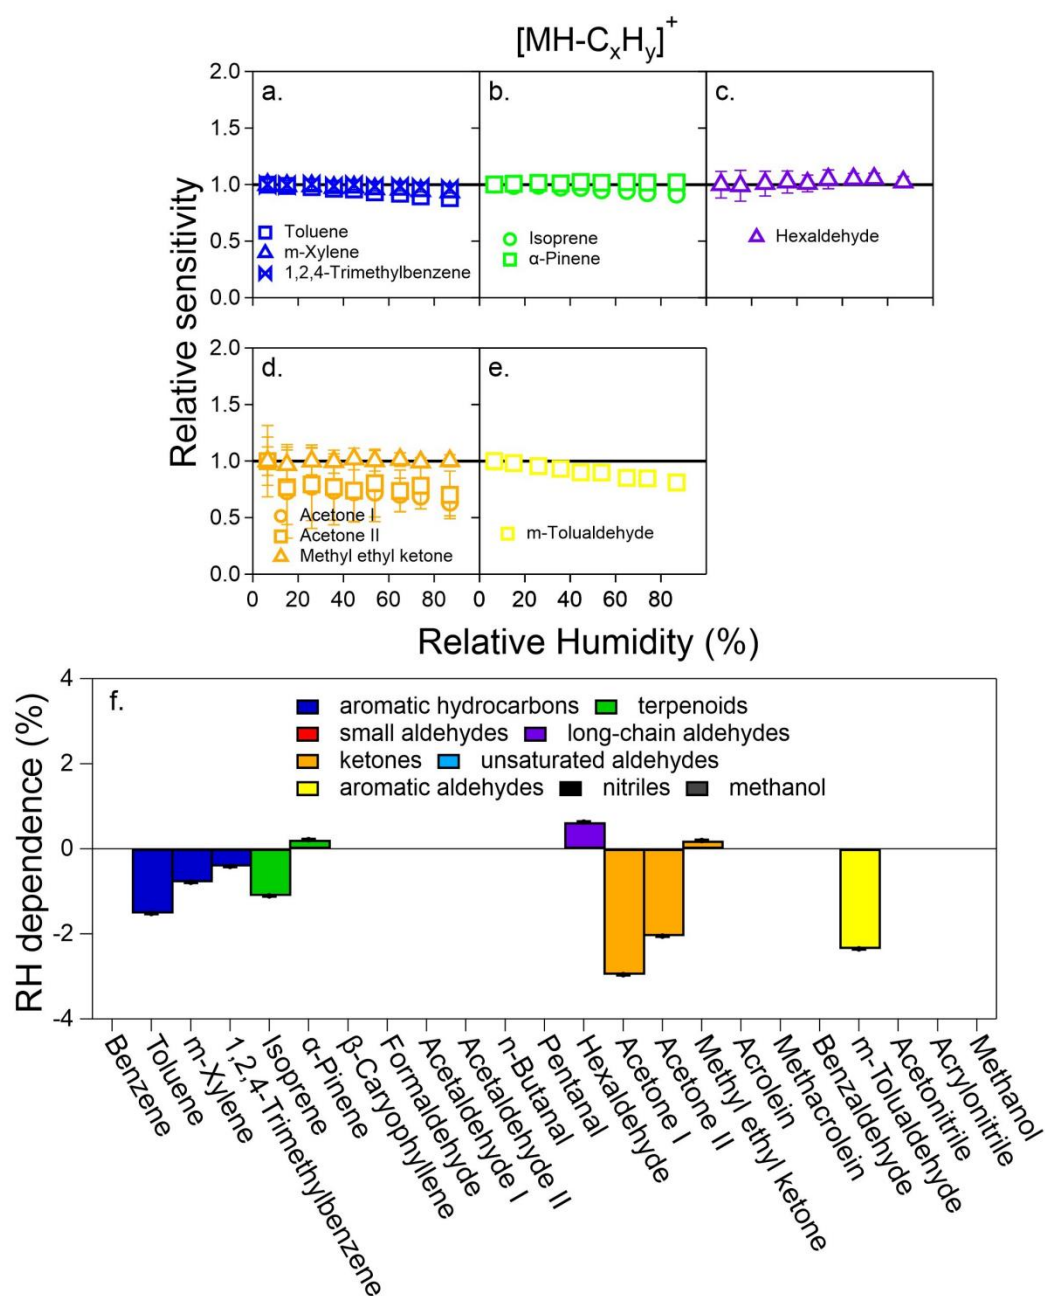

**Figure S17.** The dependence of the  $[MH-C_xH_y]^+$  signals on RH for the VOCs and OVOCs tested at a concentration of  $\sim 12$  ppbv. Panels a-e: the relative sensitivity was calculated as the slope (sensitivity) under high-RH conditions to that at the dry ( $RH < 5\%$ ) condition. Panel f: the percent change of relative sensitivity per 10% RH increase.

## References

- Blake, R. S., Patel, M., Monks, P. S., Ellis, A. M., Inomata, S., and Tanimoto, H.: Aldehyde and ketone discrimination and quantification using two-stage proton transfer reaction mass spectrometry, *International Journal of Mass Spectrometry*, 278, 15-19, <https://doi.org/10.1016/j.ijms.2008.07.010>, 2008.
- Cappellin, L., Karl, T., Probst, M., Ismailova, O., Winkler, P. M., Soukoulis, C., Aprea, E., Märk, T. D., Gasperi, F., and Biasioli, F.: On Quantitative Determination of Volatile Organic Compound Concentrations Using Proton Transfer Reaction Time-of-Flight Mass Spectrometry, *Environmental Science & Technology*, 46, 2283-2290, <https://doi.org/10.1021/es203985t>, 2012.
- Jenkin, M. E., Wyche, K. P., Evans, C. J., Carr, T., Monks, P. S., Alfarra, M. R., Barley, M. H., McFiggans, G. B., Young, J. C., and Rickard, A. R.: Development and chamber evaluation of the MCM v3.2 degradation scheme for  $\beta$ -caryophyllene, *Atmos. Chem. Phys.*, 12, 5275-5308, <https://doi.org/10.5194/acp-12-5275-2012>, 2012.
- Lindinger, W., Hansel, A., and Jordan, A.: On-line monitoring of volatile organic compounds at pptv levels by means of proton-transfer-reaction mass spectrometry (PTR-MS) medical applications, food control and environmental research, *Int J Mass Spectrom*, 173, 191-241, [https://doi.org/10.1016/S0168-1176\(97\)00281-4](https://doi.org/10.1016/S0168-1176(97)00281-4), 1998.
- Michel, E., Schoon, N., Amelynck, C., Guimbaud, C., Catoire, V., and Arijs, E.: A selected ion flow tube study of the reactions of  $\text{H}_3\text{O}^+$ ,  $\text{NO}^+$  and  $\text{O}_2^+$  with methyl vinyl ketone and some atmospherically important aldehydes, *International Journal of Mass Spectrometry*, 244, 50-59, <https://doi.org/10.1016/j.ijms.2005.04.005>, 2005.
- Milligan, D. B., Wilson, P. F., Freeman, C. G., Meot-Ner, M., and McEwan, M. J.: Dissociative proton transfer reactions of  $\text{H}_3^+$ ,  $\text{N}_2\text{H}^+$ , and  $\text{H}_3\text{O}^+$  with acyclic, cyclic, and aromatic hydrocarbons and nitrogen compounds, and astrochemical implications, *The Journal of Physical Chemistry A*, 106, 9745-9755, <https://doi.org/10.1021/jp014659j>, 2002.
- Pagonis, D., Sekimoto, K., and de Gouw, J.: A Library of Proton-Transfer Reactions of  $\text{H}_3\text{O}^+$  Ions Used for Trace Gas Detection, *J Am Soc Mass Spectr*, 30, 1330-1335, 2019.
- Sekimoto, K., Li, S. M., Yuan, B., Koss, A., Coggon, M., Warneke, C., and de Gouw, J.: Calculation of the sensitivity of proton-transfer-reaction mass spectrometry (PTR-MS) for organic trace gases using molecular properties, *International Journal of Mass Spectrometry*, 421, 71-94, 2017.
- Solouki, T. and Szulejko, J. E.: Bimolecular and unimolecular contributions to the disparate self-chemical ionizations of  $\alpha$ -Pinene and camphene isomers, *J Am Soc Mass Spectr*, 18, 2026-2039, <https://doi.org/10.1016/j.jasms.2007.08.016>, 2007.
- "Phase Transition Enthalpy Measurements of Organic and Organometallic Compounds" in NIST Chemistry WebBook, NIST Standard Reference Database Number 69, last
- Zhao, J. and Zhang, R.: Proton transfer reaction rate constants between hydronium ion ( $\text{H}_3\text{O}^+$ ) and volatile organic compounds, *Atmospheric Environment*, 38, 2177-2185, <https://doi.org/10.1016/j.atmosenv.2004.01.019>, 2004.
